# Supplementary material
Source: HighWire-hosted journal article supplement (https://jitc.bmj.com/content/12/3/e008295)
Supplement: inline-supplementary-material-1 [file inline-supplementary-material-1.pdf]

## Supplementary Materials

### **Bispecific Immune Cell Engager Enhances the Anticancer Activity of CD16+ NK Cells and Macrophages In Vitro, and Eliminates Cancer Metastasis in NK Humanized NOG Mice**

<sup>1</sup>Shahryar Khoshtinat Nikkhoi, <sup>1</sup>Ge Yang, <sup>1</sup>Hajar Owji, <sup>2</sup>Mayara Grizotte-Lake, <sup>3</sup>Rick I Cohen, <sup>4</sup>Lazaro Gil Gonzalez, <sup>1</sup>Mohammad Massumi, <sup>1,5</sup>Arash Hatefi\*

<sup>1</sup>Department of Pharmaceutics, Rutgers University, Piscataway, NJ, USA, 08854

<sup>2</sup>Taconic Biosciences, Inc., Rensselaer, NY, USA, 12144

<sup>3</sup>Department of Biomedical Engineering, Rutgers University, Piscataway, NJ, USA

<sup>4</sup>Keenan Research Centre for Biomedical Science, St. Michael's Hospital, Toronto, ON, Canada, M5B 1T8

<sup>5</sup>Cancer Pharmacology Program, Rutgers Cancer Institute of New Jersey, New Brunswick, NJ, USA, 08901

**Supplementary Method 1: Cell culture and handling**

CD16+ natural killer cells from peripheral blood (PB-NK) were purchased (Lonza, Cat# 2W-501) and maintained in X-VIVOTM 15 Serum-free Hematopoietic Cell Medium (Lonza, 02-053Q) supplemented with 100 U/mL hIL-2 and hIL-15. THP-1-CD16A cells, while in a monocytic state, were maintained in RPMI1640 (ThermoFisher), supplemented with 10% FBS (ThermoFisher) and 2 mM Glutamine-alanine (ThermoFisher). They were seeded at a density of 0.2 million per ml complete media in a low adherent flask and passaged every 3 days. SKOV-3 cells (ATCC, HTB-77) were maintained in McCoy's 5A (Modified) Medium supplemented with 10% FBS. OVASC-1 cells were maintained in RPMI 1640 media supplemented with 15% FBS and 2.5 µg/ml insulin. JIMT-1 cells were cultured in DMEM/F-12, GlutaMAX™ supplemented with 10% FBS, 100 U/ml penicillin-streptomycin, and 10 µg/ml insulin. MDA-MB-231 and BT-474 cells were purchased from ATCC and cultured as per provided protocol.

**Supplementary Method 2: Expression and purification of BiKE:E5C1**

To express BiKE, 1 liter of LB media containing 50 µg/ml kanamycin was inoculated with 20 ml of overnight culture. Once the OD<sub>600</sub> reached 1.6, 0.5 mM IPTG was added to induce protein expression. The expression continued at 25°C for 18 hours and then bacterial culture was centrifuged at 10,000 g for 10 min at 4°C. The pellet was resuspended in 70 ml of lysis buffer (**Table 1**) and incubated at room temperature (RT) for 30 min while shaking. The bacterial suspension was then sonicated (5s on, 3s off, 70% amplitude) for 3 x 15 min on ice. Next, the cell debris was pelleted via centrifugation (40,000 g, 4°C, 45 min), the supernatant was loaded onto a Ni-NTA column and washed with 30 ml of wash buffer I and wash buffer II (**Table 1**). Before eluting the target protein, the column was washed twice with 25 ml of dulbecco's phosphate buffer saline (DPBS). To elute BiKE, 100 U/mL of WELQut protease (Thermo Scientific, Cat#EO0861) was added to the resin and incubated overnight at 4°C. The purity and concentration of the eluted protein was measured using SDS-PAGE and BCA assay, respectively.

**Table 1.** The compositions of buffers that were used for the purification of the BiKE:E5C1 from bacterial lysate.

| Reagents/Buffers                 | Lysis buffer       | Wash Buffer I      | Wash Buffer II     | WELQut             |
|----------------------------------|--------------------|--------------------|--------------------|--------------------|
| MiliQ water                      | Yes                | Yes                | Yes                | Yes                |
| Tris                             | 50mM<br>(6.057g/L) | 50mM<br>(6.057g/L) | 50mM<br>(6.057g/L) | --                 |
| Na <sub>2</sub> HPO <sub>4</sub> | 100mM<br>(7.1g/L)  | 100mM<br>(7.1g/L)  | 100mM<br>(7.1g/L)  | --                 |
| NaCl                             | 250mM<br>(14.6g/L) | 500mM<br>(29.2g/L) | 1M<br>(58.4g/L)    | 250mM<br>(14.6g/L) |
| KCl                              | --                 | --                 | --                 | 250mM              |

|               |                   |                  |                  |            |
|---------------|-------------------|------------------|------------------|------------|
|               |                   |                  |                  | (18.64g/L) |
| Imidazole     | 5 mM<br>0.33g/L   | 10 mM<br>0.66g/L | 10 mM<br>0.66g/L | --         |
| EDTA          | 1mM<br>(0.292g/L) | --               | --               | --         |
| Glycerol      | 5% (v/v)          | 5% (v/v)         | 5% (v/v)         | --         |
| PBS (solvent) | --                | --               | --               | Yes        |
| Triton X-100  | 1% (10mL/L)       | 0.2% (2mL/L)     | --               | --         |
| PMSF          | 1mM               | --               | --               | --         |
| Lysozyme      | 0.2mg/mL          | --               | --               | --         |
| RNase A       | 10 ug/mL          | --               | --               | --         |
| DNase I       | 5 ug/mL           | --               | --               | --         |
| pH            | 7.0               | 7.5              | 7.5              | 7.5        |

**Supplementary Method 3:** *Measurement of the degranulation of laNK92 cells using surfaced CD107a*

SKOV-3 cells were seeded in a 96-well plate at the density of  $10^4$  cells per well and incubated overnight. The next day, a serial dilution of BiKE, spanning from 0 to 100 nM, was added into the wells and incubated for 30 minutes at 37°C. Then, laNK92 (GFP+) cells were added to SKOV-3 cells at an E:T ratio of 4. This cell combination was then incubated for 3 hours at 37°C. Following this stage, a human LAMP-1/CD107a APC-conjugated Antibody (R&D Systems, Cat#IC4800A) was added to the mix and incubated for 1 h. Subsequently, the plate was centrifuged, the supernatant was removed, and a double washing step was executed to eliminate excess antibody. A Beckman Coulter CytoFLEX Cytometer was then used for data acquisition. For data analysis, the GFP+ (laNK92) subset was gated to distinguish between the effector and target cells. In the final analytical step, the mean fluorescent intensity (MFI) of surfaced CD107a molecules within the GFP+ cell population was quantified.

**Supplementary Method 4:** *Evaluation of the impact of hIL-2 and hIL-15 on laNK92 cytotoxicity*

One day prior to the assay, 10,000 SKOV-3 cells were seeded. The next day, the cells were incubated with BiKE:E5C1 (100 nM) for 30 minutes at 37°C. This was followed by the addition of laNK92 cells at E:T ratios of 0, 1, 2, and 4. In the case of the BiKE:E5C1 kill curve, SKOV-3 cells were seeded and then treated with varying BiKE:E5C1 concentrations ranging from 0 to 100 nM for 30 minutes at 37°C. After this, laNK92 cells were added at an E:T ratio of 4. Following a 4-hour incubation period, we assessed the cell viability using alamarBlue cytotoxicity kit and protocol.

**Supplementary Method 5: Measurement of cytokine release**

SKOV-3 cells were seeded in a 96-well plate at the density of  $10^4$  cells per well. The next day, 100 nM BiKE:E5C1 was added to the plate and incubated at 37°C for 30 min. Next, PB-NK or laNK92 cells were added at E:T ratio of 4. After 24 h, plates were centrifuged at 2000 g for 10 min to pellet the cells. Then, the supernatant was transferred into a non-treated 96-well plate. The amounts of TNF- $\alpha$  and IFN- $\gamma$  cytokines were measured using DuoSet ELISA Kit (R&D Systems, USA). The data are presented as mean  $\pm$  SD (n=3).

In in vivo study, the concentrations of IFN- $\gamma$  within murine blood were measured. Blood samples were collected one week after treatment, using heparinized microhematocrit tubes (Fisher Scientific, Cat#22-362566). Following collection, blood samples were centrifuged at 10,000 g for 10 minutes at 4°C. The concentration of IFN- $\gamma$  was measured using the DuoSet ELISA Kit as mentioned above. The data are presented as mean $\pm$ s.d. (n=3).

**Supplementary Method 6:** *Genetic engineering and characterization of NK92-nLuc cells*

To engineer laNK92-nluc cells, laNK92 cells were passaged at a low density of 50,000 cells/ml supplemented with 600 IU/ml of human interleukin 2 (hIL-2) (Peprotech) and then processed using the buffers from the kit associated with Neon™ NxT electroporation system (ThermoFisher Scientific). On the day of electroporation, cells were harvested and subjected to three consecutive washes with Opti-MEM (Invitrogen). Following the final wash, cells were resuspended in a buffer solution at a concentration of  $4 \times 10^7$  cells in 850  $\mu$ l of O buffer containing 0.1% CD buffer. Subsequently, 85  $\mu$ l of this cell suspension was mixed with 15  $\mu$ l of plasmids, consisting of 5  $\mu$ g of piggybac transposase and 10  $\mu$ g of pb-nLuc. Electroporation was carried out using the Neon™ NxT electroporation system with two pulses: an initial pulse of 1650 V for 20 ms followed by a second pulse of 500 V for 100 ms (please see PMID: 31114587). Immediately post-electroporation, cells were resuspended in NK92 culture media supplemented with 600 IU/ml of hIL-2 and incubated for three days. Then, 200  $\mu$ g/ml of hygromycin B (Gibco) was added the culture media to select for nanoluciferase-expressing laNK92 cells (laNK92-nLuc). The selection process was maintained for a duration of three weeks.

To compare the proliferation rate of the laNK92 cells with laNK92-nluc cells, they were collected and washed with DPBS. Subsequently, cells were fixed using a 3.7% formaldehyde solution for a duration of 15 minutes, followed by a dual washing step with DBPS. The fixed cells were then rendered permeable through treatment with 1% Triton X-100 for 15 minutes followed by a dual washing sequence. The resultant permeabilized cells were resuspended in an intracellular staining solution comprising DPBS, 2% FBS, and 0.1% Triton-X100. To stain the cells, they were incubated overnight with APC-conjugated anti-Ki-67 antibody (Biolegend) at 4°C. Upon



completion of the staining, cells were washed three times and then analyzed using a Beckman Coulter Cytoflex flow cytometer at Rutgers Flow Cytometry Core Facility.

To compare the proliferation rates of laNK92 and laNK92-nLuc cells, the Ki-67 proliferation index was measured using flow cytometry and established protocols (please see PMID: 28446615).

**Supplementary Fig. 1:** Characterization of the PB-NK cells in terms of CD56 and CD16 receptor expression levels using flow cytometry. The data show the purity of the PB-NK cells is ~99%, and 70% of the PB-NK cells used in this study expressed CD16 receptors.

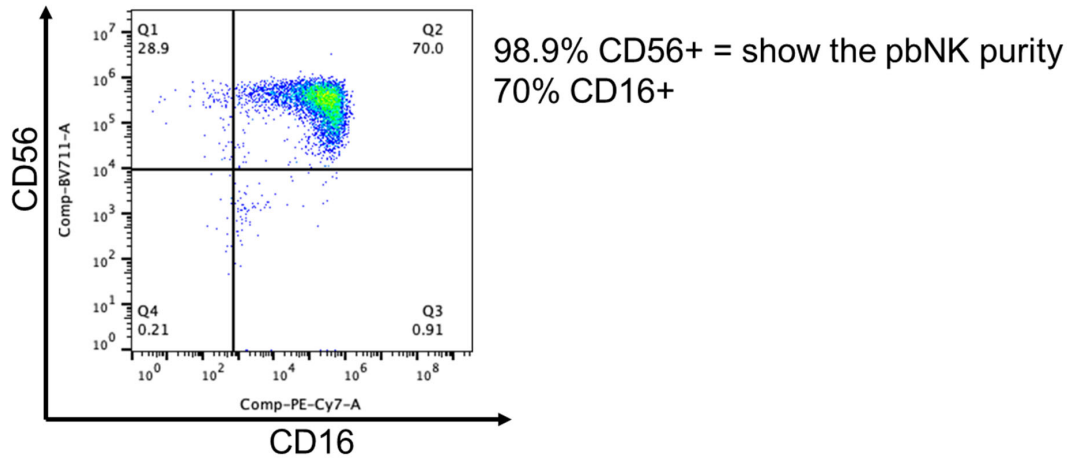

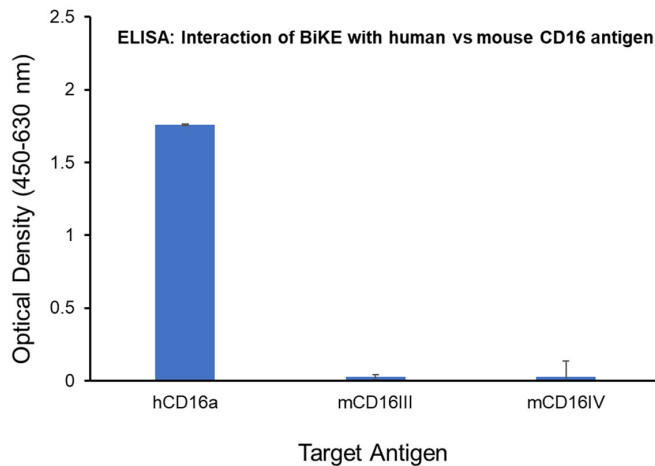

**Supplementary Fig. 2:** Characterization of BiKE:E5C1 and its interaction with mouse CD16 antigen (mCD16III and mCD16IV) using ELISA. In this experiment, a 96-well ELISA plate was coated with human CD16a, mouse CD16 III and CD16 IV proteins at concentrations of 1  $\mu\text{g}/\text{mL}$  in coating buffer. After an overnight incubation at 4°C, the coating solutions were discarded, and the plates were washed once with DPBS containing 0.05% Tween-20 (PDBS-T). Nonspecific binding sites were blocked by adding 200  $\mu\text{L}$  of blocking buffer (1% BSA in DPBS) per well and incubating at room temperature for 2 hours. Next, BiKE:E5C1, prepared at concentration of 1  $\mu\text{g}/\text{mL}$  in 0.5% BSA in DPBS, was added (100  $\mu\text{L}/\text{well}$ ). After 1 hour of incubation at room temperature while shaking at 700 rpm, the plate was washed thrice with PBS-T. Then, 100  $\mu\text{L}$  of anti-cMyc HRP-conjugated secondary antibody was added and incubated for 1 hour while shaking at 700 rpm. After additional PBS-T washing, 50  $\mu\text{L}$  of 3,3',5,5'-Tetramethylbenzidine (TMB) substrate solution was added to initiate the colorimetric reaction, which was allowed to proceed for 15 minutes at room temperature. The reaction was stopped by adding 50  $\mu\text{L}$  of 2M sulfuric acid to each well. Absorbance measurements were taken at 450 nm and 630 nm (as a reference) wavelength using Tecan Infinite<sup>®</sup> M200 PRO plate reader.
