# Supplementary material
Source: HighWire-hosted journal article supplement (https://jitc.bmj.com/content/12/3/e008295)

# Bispecific Killer Cell Engager Activates Natural Killer Cells to Eliminate Cancer Metastasis in NK Humanized NOG Mice

**Authors:** Shahryar K. Nikkhai, Ge Yang, Hajar Owji, Mayara Grizotte-Lake, Rick I Cohen, <sup>4</sup>Lazaro G. Gonzalez, Mohammad Massumi, Arash Hatefi

**Correspondence:** ahatefi@pharmacy.Rutgers.edu

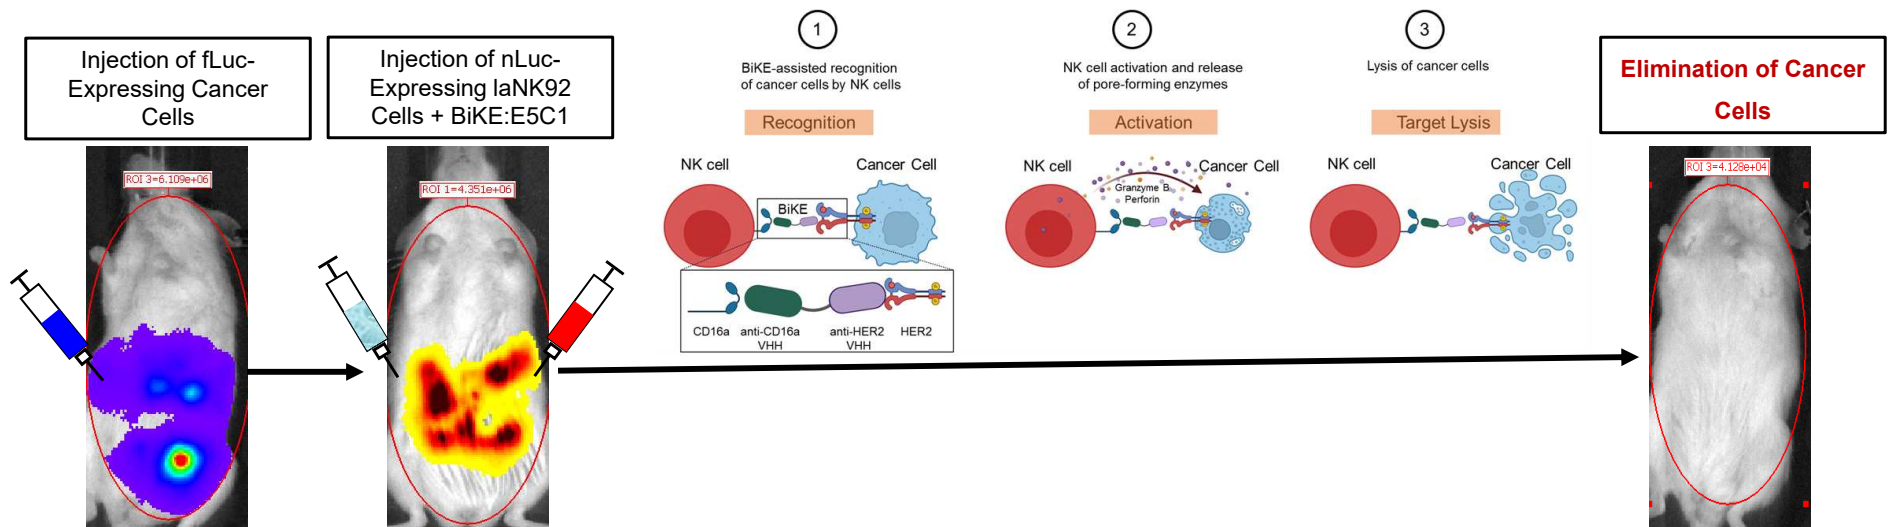

Supplement: inline-supplementary-material-2 [file inline-supplementary-material-2.pdf]
